# Association between Circulating Levels of IGF-1 and IGFBP-3 and Lung Cancer Risk: A Meta-Analysis

Hongxin Cao<sup>1</sup>\*, Guanghui Wang<sup>2</sup>\*, Long Meng<sup>2</sup>, Hongchang Shen<sup>1</sup>, Zhen Feng<sup>2</sup>, Qi Liu<sup>1</sup>, Jiajun Du<sup>1,2\*</sup>

**1** Institute of Oncology, Provincial Hospital Affiliated to Shandong University, Shandong University, Jinan, People's Republic of China, **2** Department of Thoracic Surgery, Provincial Hospital Affiliated to Shandong University, Shandong University, Jinan, People's Republic of China

## Abstract

**Background:** The insulin-like growth factor (IGF) system was documented to play a predominant role in neoplasia. As lung cancer is one of the most malignant cancers, we conducted a meta-analysis in order to investigate the strength of association between circulating IGF-1 and IGFBP-3 levels and lung cancer.

**Methodology/Principal Findings:** A systematic literature search was conducted to identify all prospective case-control studies and case-control studies on circulating IGFs and IGFBPs levels. Six nested case-control studies (1 043 case subjects and 11 472 control participants) and eight case-control studies (401 case subjects and 343 control participants) were included in this meta-analysis. Pooled measure was calculated as the inverse variance-weighted mean of the natural logarithm of multivariate adjusted OR with 95% CIs for highest vs. lowest levels to assess the association of circulating IGF-1 and IGFBP-3 concentrations and lung cancer. Standard mean difference (SMD) was also calculated to indicate the difference of the circulating IGF-1 and IGFBP-3 concentrations between the lung cancer case group and the control group. Of the nested case-control studies, ORs for the highest vs. lowest levels of IGF-1 and IGFBP-3 were 1.047 (95% CI: [0.802,1.367],  $P=0.736$ ) and 0.960 (95%CI: [0.591,1.559],  $P=0.868$ ) respectively; and SMDs were  $-0.079$  (95%CI:[  $-0.169, 0.011$ ],  $P=0.086$ ) and  $-0.097$  (95%CI:[  $-0.264,0.071$ ],  $P=0.258$ ) for IGF-1 and IGFBP-3 respectively. As to the case-control studies, SMDs were 0.568 (95%CI:[  $-0.035, 1.171$ ],  $P=0.065$ ) and  $-0.780$  (95%CI:[  $-1.358, -0.201$ ],  $P=0.008$ ) for IGF-1 and IGFBP-3 respectively.

**Conclusions/Significance:** Inverse association was shown between IGFBP-3 and lung cancer in the case-control studies, and the circulating level of IGFBP-3 underwent a decline during tumorigenesis and development of lung cancer, which suggested IGFBP-3 a promising candidate for the biomarker of lung cancer.

**Citation:** Cao H, Wang G, Meng L, Shen H, Feng Z, et al. (2012) Association between Circulating Levels of IGF-1 and IGFBP-3 and Lung Cancer Risk: A Meta-Analysis. PLoS ONE 7(11): e49884. doi:10.1371/journal.pone.0049884

**Editor:** Xianglin Shi, University of Kentucky, United States of America

**Received:** July 25, 2012; **Accepted:** October 15, 2012; **Published:** November 19, 2012

**Copyright:** © 2012 Cao et al. This is an open-access article distributed under the terms of the Creative Commons Attribution License, which permits unrestricted use, distribution, and reproduction in any medium, provided the original author and source are credited.

**Funding:** This study was supported by Provincial natural science foundation of Shandong (ZR2010HM067 and ZR2011HM077) and Provincial Science and Technology Development Planning of Shandong (2011GGH21819). The funders had no role in study design, data collection and analysis, decision to publish, or preparation of the manuscript.

**Competing Interests:** The authors have declared that no competing interests exist.

\* E-mail: dujiajun@sdu.edu.cn

† These authors contributed equally to this work.

## Introduction

The insulin-like growth factor (IGF) system is viewed as a complex multifactorial system in both physiological and pathophysiological conditions. It comprises of two ligands (IGF-1 and IGF-2), three cell-membrane receptors (insulin receptor (IR), IGF-1 receptor (IGF-1R) and IGF-2 receptor (IGF-2R)), and six high-affinity IGF binding proteins (IGFBP-1 through -6) [1]. In normal conditions, the levels of the components reach a balance, so that the IGF axis can perform as a regulator of cellular proliferation as well as cell survival. While in case the original balance is broken, it plays a predominant role in pathogenesis, of which neoplasia is currently attracting substantial interest. Sustaining proliferative signaling and evading growth suppressors which are caused by over-expression of growth factors or their receptors are now regarded as hallmarks of cancer [2].

The IGFs and IGFBPs are mainly synthesized in liver, meanwhile, they also functionate in autocrine and paracrine modes. IGF-1 has been documented to perform strong mitogenic

and anti-apoptotic effects both in normal and cancerous cells [3,4], including lung cancer cell lines [5,6]. Most serum IGFs are not in free forms, but bonding with IGFBPs, of which IGFBP-3 is the predominant member [7]. The IGFBPs regulate the biological accessibility and activity of the IGFs by increasing the half-lives of circulating IGFs and controlling their availability for receptor binding. Beyond that, IGFBP-3 acts as an inhibitor or potentiator of IGFs independently of IGF-1 binding. In several non-small cell lung cancer (NSCLC) cell lines, IGFBP-3 acts as a potent inhibitor of IGF-1R signaling by interfering with both the MAPK and PI-3K/Akt signaling pathways, resulting in growth arrest and inducing apoptosis [8].

Above on, an elevated level of circulating IGF-1 and/or a lower level of IGFBP-3 was related to the increased risk of cancers, and this was supported by some studies in breast, prostate and colorectal cancers [9,10,11]. For risk stratification, they were supposed to be promising biomarkers of cancer for early diagnosis and prognosis. But practically, there were also some epidemiological studies showing null association between circulating IGF-1

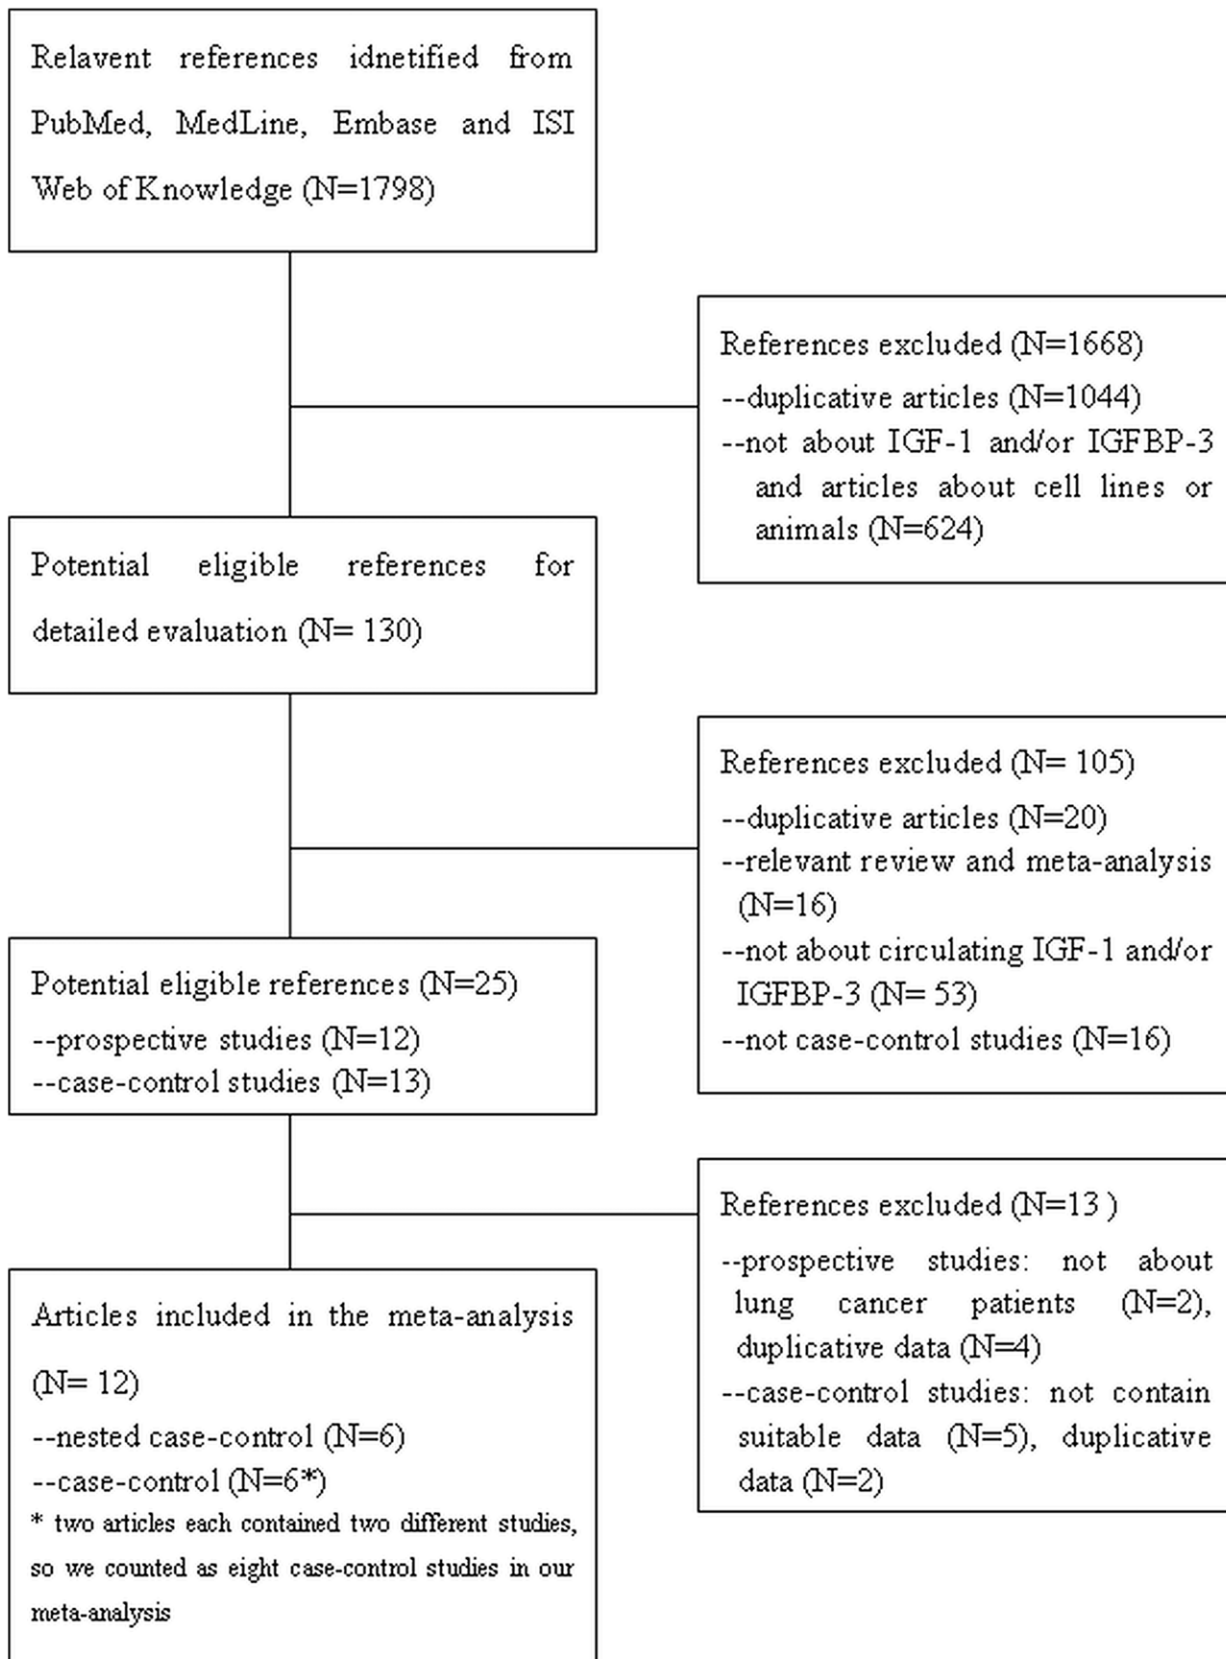

**Figure 1. Flow diagram of included studies for this meta-analysis.**  
doi:10.1371/journal.pone.0049884.g001

and IGFBP-3 levels and cancers [12,13,14]. Also for lung cancer, several conclusions of the studies reached consistency, but even so, some appeared contradictory.

On the foundation of the inconsistent results, we performed a meta-analysis expecting to investigate the strength of association between circulating IGF-1 and IGFBP-3 levels and lung cancer.

## Methods

### Data Collection and Selection Criteria for Meta-analysis

A literature search was carried out on PubMed, MedLine, Embase and ISI Web of Knowledge using the terms: “insulin-like growth factor-1” “insulin-like growth factor bonding protein-3” “lung cancer” “serum” with all possible combinations. All potentially eligible studies were retrieved, and their bibliographies were checked for other pertinent articles. Review articles and bibliographies of other pertinent articles identified were manually inspected to find additional eligible studies. The inclusion criteria in the meta-analysis were as follows: 1) prospective cohort studies, nested case-control studies and case-control studies published before August 2012; 2) articles contained data on circulating IGF-1, IGFBP-3, and lung cancer risk; 3) the most informative article when multiple articles were published by the same authors or groups. The following articles were excluded: 1) review articles without original data; 2) articles lacking data or containing data inappropriate for meta-analysis; 3) case reports and 4) overlapping articles or duplicate data. All potentially relevant articles were reviewed by two investigators independently, and the final decision was made depending on correspondence of the investigators.

### Data Extraction

Data extraction and quality assessment were conducted independently by two investigators using a standardized protocol and data recording form. And information was examined and adjudicated independently after being extracted and assessed.

A total of 1 798 articles were retrieved after the first search in PubMed, MedLine, Embase and ISI Web of Knowledge. As shown in **Fig. 1**, six nested case-control studies [15,16,17,18,19,20] (**Table 1**) and eight case-control studies [21,22,23,24,25,26] (two articles contained two studies that matched our needs respectively) (**Table 2**) met the criteria described in the previous section. The following data were collected from each study: name of the first author, year of publication, years of follow-up, region of the studies, mean age, gender of the cases, pathological type, assay methods of IGF-1 and IGFBP-3, number of the case and control groups, mean and standard deviation (SD) of IGF-1 and IGFBP-3, odds ratio (OR) for highest vs. lowest levels and its corresponding 95% confidence interval (CI), adjusting factors as well as other details described in the articles.

### Statistical Analyses

Definitely, a nested case-control study is comprised of subjects sampled from an assembled epidemiological prospective cohort study in which the sampling depends on disease status, that is, it compares exposures in case patients (patients in the cohort who develop disease) and a sample of individuals in the cohort who have not developed disease; case-control study is a retrospective study in which patients who already have a certain condition are compared to people who do not [27,28,29]. In other words, the blood samples of the nested case-control studies were collected at the beginning of the studies, that is, the IGF-1 and IGFBP-3 concentrations indicated the state of the cases several years before the detectable neoplasm appeared; whereas blood samples of the

case-control studies were collected after the cases were definitely diagnosed as lung cancer patients. As a result, we hypothesized that the internal environments of the cases were of different conditions at the two stages when the blood samples were collected, so we processed the data separately in order to find any difference if it did exist.

With regard to the nested case-control studies, we used adjusted OR with 95% CIs for highest vs. lowest levels as the principal effective measure. Pooled measure was calculated as the inverse variance-weighted mean of the natural logarithm of multivariate adjusted OR with 95% CIs for highest vs. lowest levels to assess the association of circulating IGF-1 and IGFBP-3 concentrations and lung cancer. Standard mean difference (SMD) was also calculated to indicate the difference of the circulating IGF-1 and IGFBP-3 concentrations between the lung cancer case group and the control group.

For the case-control studies, we only adopted means and SDs as the applied measure to assess the circulating IGF-1 and IGFBP-3 concentrations between the lung cancer case group and the control group because ORs were not provided in most of the studies.

Heterogeneity between trials was evaluated by I-squared ( $I^2$ ) statistic [30]. These indices assess the percentage of variability across studies attributable to heterogeneity rather than chance. Statistical heterogeneity was considered significant when  $I^2 > 50\%$ . An  $I^2$  value  $< 50\%$  for the  $I^2$  statistic indicates a lack of heterogeneity among studies, so the pooled OR estimate of the each study was calculated by the fixed effects model (the Mantel-Haenszel method) [31]. Or else, the random-effects model (the DerSimonian and Laird method) was used [32].

The ‘leave one out’ sensitive analysis [33] was carried out using  $I^2 > 50\%$  as the criteria to evaluate the key studies with substantial impact on between-study heterogeneity. Publication bias was estimated using Egger’s regression asymmetry test [34]. An analysis of influence was conducted [35], which described how robust the pooled estimator was to removal of individual studies. An individual study was suspected of excessive influence, if the point estimate of its omitted analysis lied outside the 95% CI of the combined analysis. All reported  $P$  values were two-sided with significance set at  $< 0.05$ . Statistical analyses were carried out using STATA 11.0 (Stata Corporation, Collage Station, Texas, USA).

## Results

### Nested Case-control Studies

Six nested case-control studies were ultimately chosen in this meta-analysis. All studies combined, a total number of 1 043 case subjects and 11 472 control participants were included. Four articles offered the means and SDs of the circulating concentrations of IGF-1 and IGFBP-3, and amount to 682 case subjects and 1 623 control participants were included.

With respect to the circulating IGF-1 concentration and lung cancer risk, initial meta-analysis has shown that it was at no significantly increased risk with the OR of 1.047 (95% CI: [0.802, 1.367],  $P = 0.736$ ) for the highest vs. lowest levels of IGF-1 (**Fig. 2A**). SMD of the four articles didn’t show statistical difference between the case and control group with SMD of  $-0.079$  (95% CI: [  $-0.169, 0.011$  ],  $P = 0.086$ ) (**Fig. 2C**).

Concerning the relationship of circulating IGFBP-3 concentration and lung cancer risk, the pooled OR 0.960 (95% CI: [0.591, 1.559],  $P = 0.868$ ) (**Fig. 2B**) as well as to SMD  $-0.097$  (95% CI: [  $-0.264, 0.071$  ],  $P = 0.258$ ) (**Fig. 2D**) were calculated similar to that of IGF-1. The statistical power was not

**Table 1.** Characteristics of the nested case-control studies included in this meta-analysis.

| Study           | Year | Region  | Age   | Gender | Sample | Follow-up (years) | T (°C) | Assay method |         | sample size |         | mean(SD) for IGF-1 (ng/ml) |             | mean(SD) for IGFBP-3 (ng/ml) |              | OR(95%CI)       |                 | Adjusting factors                                                                      |
|-----------------|------|---------|-------|--------|--------|-------------------|--------|--------------|---------|-------------|---------|----------------------------|-------------|------------------------------|--------------|-----------------|-----------------|----------------------------------------------------------------------------------------|
|                 |      |         |       |        |        |                   |        | IGF-1        | IGFBP-3 | case        | control | case                       | control     | case                         | control      | IGF-1           | IGFBP-3         |                                                                                        |
| Lukanova A [15] | 2001 | USA     | 32–72 | F      | serum  | 8–14              | –      | RIA          | RIA     | 93          | 186     | 129.8(10.4)                | 131.1(7.75) | 4387(166)                    | 4413(125.5)  | 0.54(0.14–0.7)  | 0.9(0.28–2.85)  | time since last meal, cotinine, BMI, IGFBP-3 for IGF-1, and IGF-1 for IGFBP-3          |
| London SJ [16]  | 2002 | China   | 45–64 | M      | serum  | 8–11              | –20    | RIA          | IRMA    | 230         | 740     | 123(46.43)                 | 127(41.64)  | 1793(487.47)                 | 1863(485.77) | 0.86(0.47–0.57) | 0.5(0.25–1.02)  | smoking, IGFBP-3 for IGF-1, and IGF-1 for IGFBP-3                                      |
| Spitz MR [17]   | 2002 | USA     | 50–69 | M+F    | serum  | >11               | –80    | ELISA        | ELISA   | 159         | 297     | 158(56)                    | 153(54)     | 30700(8200)                  | 29400(7900)  | 0.64(0.31–0.33) | 2.35(1.13–4.92) | BMI, smoking, exposure population, IGFBP-3 for IGF-1, and IGF-1 for IGFBP-3            |
| Wakai K. [18]   | 2002 | Japan   | 40–79 | M+F    | serum  | 8                 | –80    | IRMA         | IRMA    | 194         | 9351    | –                          | –           | –                            | –            | 1.74(1.08–0.81) | 0.67(0.45–1.01) | area, gender, age, smoking habits, BMI, and IGFBP-3 for IGF-1                          |
| Ahn J [19]      | 2006 | Finland | 50–69 | M      | serum  | >5                | –      | ELISA        | ELISA   | 200         | 400     | 137.2(52.3)                | 145.5(52)   | 2228(650)                    | 2369(640)    | 0.76(0.39–0.49) | 0.71(0.35–1.47) | age, intervention arm, BMI, years of smoking, IGFBP-3 for IGF-1, and IGF-1 for IGFBP-3 |
| Morris JK [20]  | 2006 | UK      | 35–64 | M      | serum  | 15                | –40    | ELISA        | ELISA   | 167         | 498     | –                          | –           | –                            | –            | 1.21(0.62–0.35) | 1.7(0.87–3.3)   | age by matching, smoking                                                               |

M: male; F: female; T: storage temperature; RIA, radioimmunoassay; IRMA, immunoradiometric assay; ELISA, enzyme-linked immunosorbent assay; BMI, body mass index. doi:10.1371/journal.pone.0049884.t001

**Table 2.** Characteristics of the case-control studies included in this meta-analysis.

| Study               | Year | Area   | Mean age (case/control) | Gender | Cases | Sample | T (°C) | Assay method |         | Sample size |         | Mean(SD) for IGF-1(ng/ml) |                | mean(SD) for IGFBP-3(ng/ml) |                  |
|---------------------|------|--------|-------------------------|--------|-------|--------|--------|--------------|---------|-------------|---------|---------------------------|----------------|-----------------------------|------------------|
|                     |      |        |                         |        |       |        |        | IGF-1        | IGFBP-3 | case        | control | case                      | control        | case                        | control          |
| Bhatavdekar JM [21] | 1994 | India  | -                       | M      | -     | serum  | -70    | RIA          | -       | 9           | 25      | 211.68 (219)              | 33.33(41.6)    | -                           | -                |
| Bhatavdekar JM [21] | 1994 | India  | -                       | M      | -     | serum  | -70    | RIA          | -       | 28          | 25      | 134.11(127.31)            | 33.33(41.6)    | -                           | -                |
| Lee DY [22]         | 1999 | Korea  | -                       | M+F    | N+S   | serum  | -70    | RIA          | WLB     | 41          | 20      | 207.9 (62.9)              | 281.3(53.9)    | -                           | -                |
| Wu XF [23]          | 2000 | USA    | 62/63                   | M+F    | N+S   | plasma | -80    | ELISA        | ELISA   | 183         | 227     | 166(69.02)                | 143(61.50)     | 3674(931.76)                | 3745(937.81)     |
| Wang H [24]         | 2004 | China  | 62.5/59                 | M+F    | N+S   | serum  | -20    | RIA          | IRMA    | 78          | 14      | 570.67(185.80)            | 427.66(141.49) | 3133.60(1110.30)            | 4024.67(1373.31) |
| Unsal E [25]        | 2005 | Turkey | 60/40                   | M+F    | N+S   | serum  | -40    | IRMA         | IRMA    | 24          | 12      | 126.9(63.4)               | 167.6(56.5)    | 2277.6(614.0)               | 2874.7(861.9)    |
| Izycki T [26]       | 2006 | Poland | 59.4/-                  | M+F    | N     | serum  | -      | ELISA        | ELISA   | 25          | 10      | 123.6(43.3)               | 74.2(12.0)     | 1385.5(344.8)               | 1732.4(312.1)    |
| Izycki T [26]       | 2006 | Poland | 60.2/-                  | M+F    | S     | serum  | -      | ELISA        | ELISA   | 13          | 10      | 134.5(44.8)               | 72.3(18.0)     | 1276.2(264.8)               | 1732.4(312.2)    |

M,male; F,female; N,NSCLC; S,SCLC; T, storage temperature; RIA, radioimmunoassay; IRMA, immunoradiometric assay; ELISA, enzyme-linked immunoabsorbent assay; WLB, Western ligand blot.

strong enough to demonstrate the relationship between IGFBP-3 concentration and lung cancer risk.

**Case-control Studies**

Eight case-control studies were involved in this meta-analysis, among which eight included means and SDs of the circulating concentration of IGF-1, that is, a total of 401 case subjects and 343 control participants were included. The circulating concentration of IGFBP-3 was mentioned in five studies, that is, 323 case subjects and 273 control participants were involved.

In order to investigate the circulating IGF-1 concentration and lung cancer risk, the SMD 0.568 (95%CI: [-0.035, 1.171], *P*=0.065) (Fig. 3A) was calculated with the means and SDs supplied in the articles. Statistically, no difference between the case and control group was seen.

As to the relationship between the circulating IGFBP-3 concentration and lung cancer risk, we also calculated the SMD -0.780 (95%CI: [-1.358, -0.201], *P*=0.008) (Fig. 3B) with the means and SDs supplied in the articles. We could see inverse relationship between the circulating concentration of IGFBP-3 and lung cancer risk.

**IGF-1 and IGFBP-3 in Nested Case-control Studies and Case-control Studies**

In both the nested case-control studies and case-control studies, the pooled results showed no statistical difference between the case subjects and the control participants for the circulating levels of IGF-1, indicating the circulating levels of the IGF-1 were both in the normal range at the corresponding time. When it came to the circulating IGFBP-3 levels, no difference was shown between the case subjects and the control participants in the nested case-control studies, but that of lung cancer patients' was significantly lower than the control participants' in the case-control studies. Circulating IGFBP-3 status detected years before the diagnosis of lung cancer was within the normal range; however, the circulating IGFBP-3 status of the confirmed lung cancer patients was lower than normal range. Evident fall of the circulating IGFBP-3 levels of the lung cancer patients was shown even though we couldn't define the pattern and duration of the decline.

**Sensitive Analysis and Publication Bias Analysis**

The 'leave one out' sensitive analysis was conducted using *I*<sup>2</sup>>50% as the criteria to evaluate the key studies with substantial impact on between-study heterogeneity. The pooled ORs and SMDs were not materially altered after the sensitive analysis.

In the Egger's regression asymmetry test, there was no evidence of publication bias of the IGF-1 and IGFBP-3 in the nested case-control studies and IGF-1 in the case-control studies. But IGFBP-3 in the case-control studies was tested to have publication bias.

**Discussion**

The pooled results of the meta-analysis didn't show evidence of the relationship between the circulating concentrations of IGF-1 and IGFBP-3 and lung cancer risk in the nested case-control studies. The result was in accordance with most of the nested case-control studies included in this meta-analysis. Though London, S. J. et al. declared that subjects with higher serum levels of IGFBP-3 were at reduced risk of lung cancer from a prospective study of men in China [16], the pooled data didn't show telltale of the function of high circulating IGFBP-3 level to reduced risk of lung cancer. It indicated that neither the circulating level of IGF-1 nor that of IGFBP-3 could act as long-term(the follow-up period were all more than five years and some even more than twenty years in

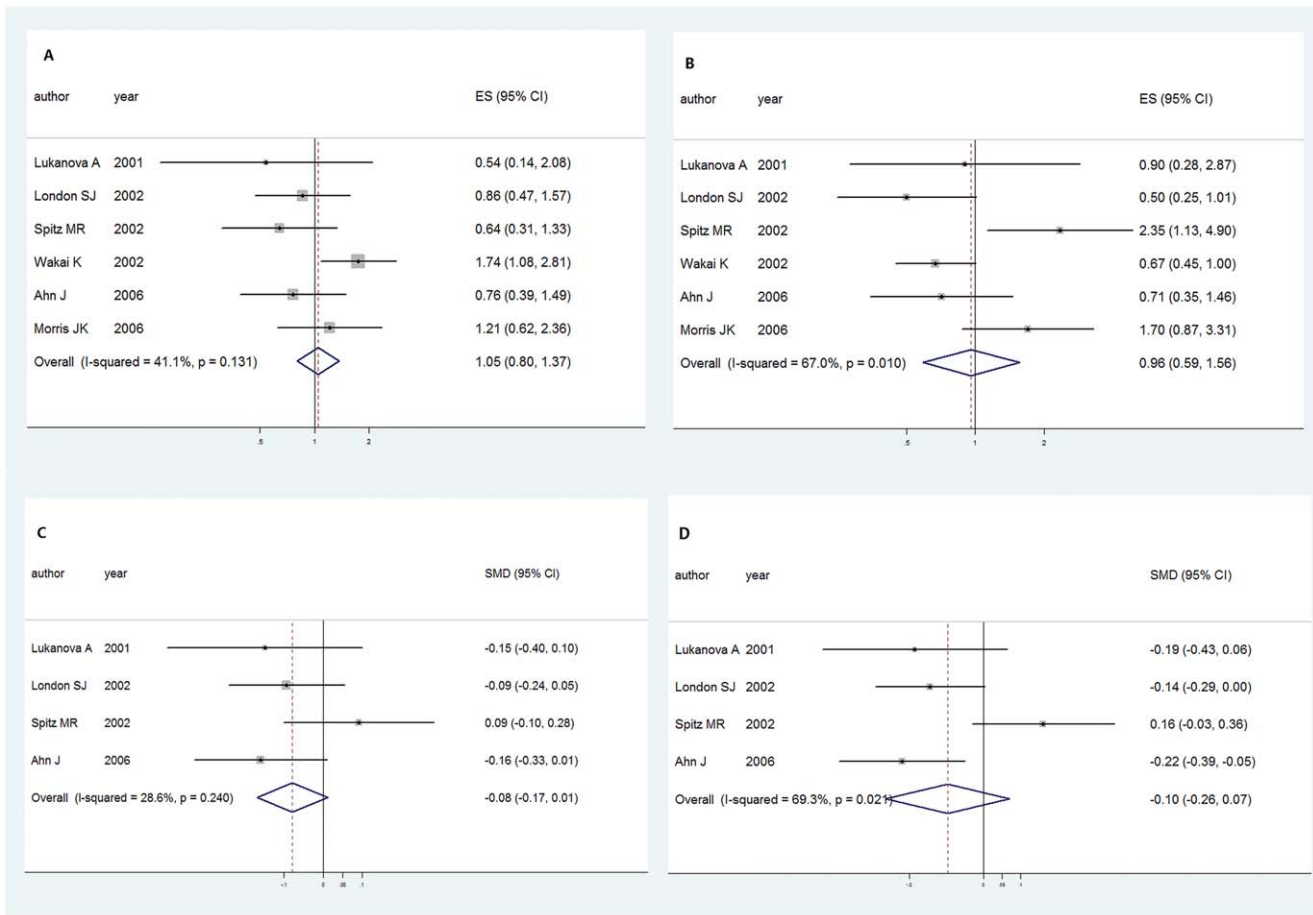

**Figure 2. Forest plot of cancer risk associated with the IGF-1 and IGFBP-3 in nested case-control studies.** A. Odds ratios with corresponding 95% CIs of the circulating IGF-1 level of individual studies and pooled data of the nested case-control studies. B. Odds ratios with corresponding 95% CIs of the circulating IGFBP-3 level of individual studies and pooled data of the nested case-control studies. C. Standard mean differences with corresponding 95% CIs of the circulating IGF-1 level of individual studies and pooled data of the nested case-control studies. D. Standard mean differences with corresponding 95% CIs of the circulating IGFBP-3 level of individual studies and pooled data of the nested case-control studies.

doi:10.1371/journal.pone.0049884.g002

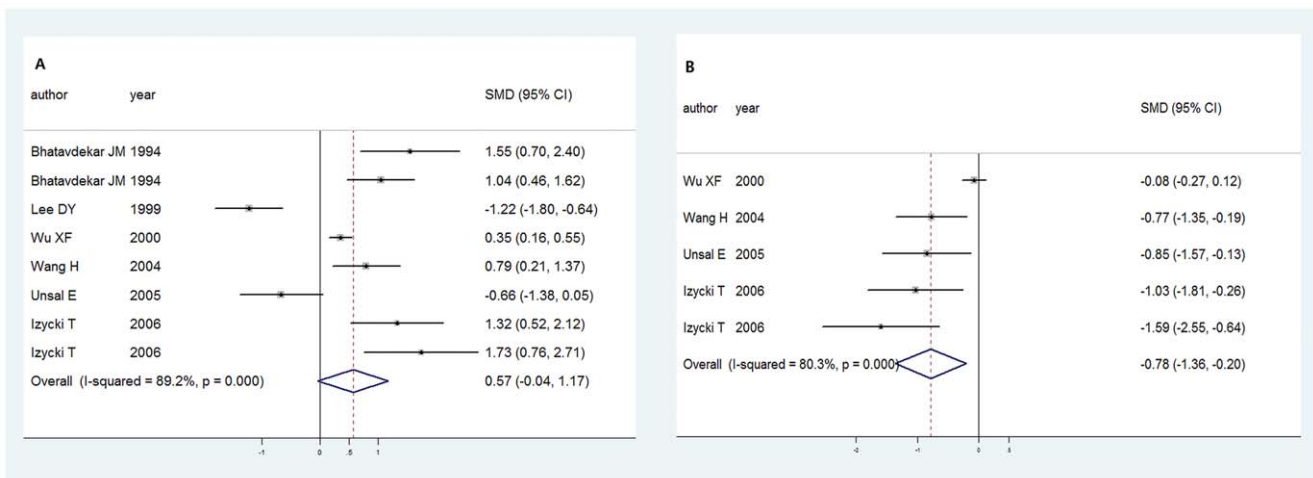

**Figure 3. Forest plot of cancer risk associated with the IGF-1 and IGFBP-3 in case-control studies.** A. Standard mean differences with corresponding 95% CIs of the circulating IGF-1 level of individual studies and pooled data of the case-control studies. B. Standard mean differences with corresponding 95% CIs of the circulating IGFBP-3 level of individual studies and pooled data of the case-control studies.

doi:10.1371/journal.pone.0049884.g003

the prospective studies we included in this meta-analysis) predictor of lung cancer.

Similarly, the meta-analysis showed no association between the circulating IGF-1 level and lung cancer in the case-control studies though the mean value of circulating concentration of IGF-1 of case subjects was higher than that of the control group in several studies involved in the meta-analysis [24,26,36]. But the circulating concentration of IGFBP-3 was showed to inversely associate with lung cancer. In another word, the lung cancer patients were statistically demonstrated to have lower levels of circulating IGFBP-3 compared with control participants, which suggested IGFBP-3 a promising candidate for the biomarkers of lung cancer.

What's more, the difference between the nested case-control studies and the case-control studies highlighted our notice. The circulating IGFBP-3 concentrations of blood samples collected years before detectable lung cancer were of no difference with that of the control participants (people who involved in the prospective studies without lung cancer until the endpoint of the studies); whereas, when it came to the case-control studies, the circulating IGFBP-3 concentrations of blood samples from the definitely diagnosed lung cancer patients were significantly lower than that of the control participants. Though the results were gained from different populations, we speculated that the IGFBP-3 level underwent a decline during the process of tumorigenesis and development and remarkable fall of the circulating IGFBP-3 level might be detected during the rapidly progressing period of the tumorigenesis. This result echoed the hypothesis we mentioned before to a certain degree. We also assumed that there would be a conceivable time point that the concentration of circulating IGFBP-3 could participant in helping us to distinguish the status of people into high lung cancer risk and low lung cancer risk groups. Further research should be conducted emphasizing larger studies, pooled analyses, analyses by cancer subtype, improved exposure assessment, better and standard design categories, and possible mechanisms to corroborate the assumption.

The potential insufficiency of this meta-analysis was that the studies designs and the assay methods of serum IGF-1 and IGFBP-

3 as well as other risk factors were not standardized. The nonstandard assay methods were the main cause of the heterogeneity between studies. So we used OR with 95% CIs for highest vs. lowest levels with the most adjusting factors as the principal effective measure if the original articles supplied in order to offset the insufficiency as possible as we could. Moreover, in order to identify whether the long-term storage of the blood samples would influence the concentration of IGFs, Morris, J. K. et al. carried out an experiment to test the concentrations of IGFs both the samples collected prior to 1982 which stored at  $-40^{\circ}\text{C}$  and samples collected in 2003. Thereinto, the median levels of the blood samples prior to 1982 compared with the median of blood samples in 2003 were 1% (95% CI:  $[-12\%,+25\%]$ ) higher for IGF-1 ( $P=0.66$ ), demonstrating that the long-term storage (over 20 years) of the serum at  $-40^{\circ}\text{C}$  did not change the levels of IGF-1 [20]. So we considered that the concentrations of IGF-1 and IGFBP-3 of the serum with long-term storage were believable.

Circulating IGF-1 and IGFBP-3 absorbed the point of view of many scientists for their great potential. Efforts have been made expecting to prove the clinical significance of circulating IGF-1 and IGFBP-3 in cancers by evidence-based methods [37,38,39,40,41,42], among which lung cancer is a magnificent being [43,44]. With precise statistical methods and more studies included in, we got convincing results that the circulating IGFBP-3 level was inversely associated with lung cancer in the case-control studies. Practically, measurements from case-control studies might reflect tumor marker status rather than true risk assessment. It provided hopefully base to translate the laboratory indicator into clinical setting as a tumor marker. Moreover, a decline of IGFBP-3 during tumorigenesis was inferred through our results.

## Author Contributions

Conceived and designed the experiments: HC JD HS. Performed the experiments: HC GW LM. Analyzed the data: HC LM ZF GW. Contributed reagents/materials/analysis tools: QL. Wrote the paper: HC JD.

## References

- Samani AA, Yakar S, LeRoith D, Brodt P (2007) The role of the IGF system in cancer growth and metastasis: overview and recent insights. *Endocrine reviews* 28: 20–47.
- Hanahan D, Weinberg RA (2011) Hallmarks of cancer: the next generation. *Cell* 144: 646–674.
- Pollak MN, Schernhammer ES, Hankinson SE (2004) Insulin-like growth factors and neoplasia. *Nat Rev Cancer* 4: 505–518.
- Khandwala HM, McCutcheon IE, Flyvbjerg A, Friend KE (2000) The effects of insulin-like growth factors on tumorigenesis and neoplastic growth. *Endocr Rev* 21: 215–244.
- Macaulay VM, Everard MJ, Derrick Teale J, Trott PA, Van Wyk JJ, et al. (1990) Autocrine function for insulin-like growth factor I in human small cell lung cancer cell lines and fresh tumor cells. *Cancer research* 50: 2511.
- Quinn KA, Treston AM, Unsworth EJ, Miller MJ, Vos M, et al. (1996) Insulin-like growth factor expression in human cancer cell lines. *Journal of Biological Chemistry* 271: 11477–11483.
- Kelley KM, Oh Y, Gargosky SE, Gucev Z, Matsumoto T, et al. (1996) Insulin-like growth factor-binding proteins (IGFBPs) and their regulatory dynamics. *Int J Biochem Cell Biol* 28: 619–637.
- Lee HY, Chun KH, Liu B, Wiehle SA, Cristiano RJ, et al. (2002) Insulin-like growth factor binding protein-3 inhibits the growth of non-small cell lung cancer. *Cancer Res* 62: 3530–3537.
- Schraier C, McCarty CA, Isaacs C, Sue LY, Pollak MN, et al. (2010) Circulating insulin-like growth factor (IGF)-I and IGF binding protein (IGFBP)-3 levels and postmenopausal breast cancer risk in the prostate, lung, colorectal, and ovarian cancer screening trial (PLCO) cohort. *Horm Cancer* 1: 100–111.
- Stattin P, Rinaldi S, Biessy C, Stenman UH, Hallmans G, et al. (2004) High levels of circulating insulin-like growth factor-I increase prostate cancer risk: a prospective study in a population-based nonscreened cohort. *J Clin Oncol* 22: 3104–3112.
- Vatten IJ, Holly JM, Gunnell D, Tretli S (2008) Nested case-control study of the association of circulating levels of serum insulin-like growth factor I and insulin-like growth factor binding protein 3 with breast cancer in young women in Norway. *Cancer Epidemiol Biomarkers Prev* 17: 2097–2100.
- Schernhammer ES, Holly JM, Hunter DJ, Pollak MN, Hankinson SE (2006) Insulin-like growth factor-I, its binding proteins (IGFBP-1 and IGFBP-3), and growth hormone and breast cancer risk in The Nurses Health Study II. *Endocr Relat Cancer* 13: 583–592.
- Roddam AW, Allen NE, Appleby P, Key TJ (2008) Endogenous sex hormones and prostate cancer: a collaborative analysis of 18 prospective studies. *J Natl Cancer Inst* 100: 170–183.
- Otani T, Iwasaki M, Sasazuki S, Inoue M, Tsugane S (2007) Plasma C-peptide, insulin-like growth factor-I, insulin-like growth factor binding proteins and risk of colorectal cancer in a nested case-control study: the Japan public health center-based prospective study. *Int J Cancer* 120: 2007–2012.
- Lukanova A, Toniolo P, Akhmedkhanov A, Biessy C, Haley NJ, et al. (2001) A prospective study of insulin-like growth factor-I, IGF-binding proteins-1, -2 and -3 and lung cancer risk in women. *Int J Cancer* 92: 888–892.
- London SJ, Yuan JM, Travlos GS, Gao YT, Wilson RE, et al. (2002) Insulin-like growth factor I, IGF-binding protein 3, and lung cancer risk in a prospective study of men in China. *J Natl Cancer Inst* 94: 749–754.
- Spitz MR, Barnett MJ, Goodman GE, Thornquist MD, Wu X, et al. (2002) Serum insulin-like growth factor (IGF) and IGF-binding protein levels and risk of lung cancer: a case-control study nested in the beta-Carotene and Retinol Efficacy Trial Cohort. *Cancer Epidemiol Biomarkers Prev* 11: 1413–1418.
- Wakai K, Ito Y, Suzuki K, Tamakoshi A, Seki N, et al. (2002) Serum insulin-like growth factors, insulin-like growth factor-binding protein-3, and risk of lung cancer death: a case-control study nested in the Japan Collaborative Cohort (JACC) Study. *Jpn J Cancer Res* 93: 1279–1286.
- Ahn J, Weinstein SJ, Snyder K, Pollak MN, Virtamo J, et al. (2006) No association between serum insulin-like growth factor (IGF)-I, IGF-binding protein-3, and lung cancer risk. *Cancer Epidemiol Biomarkers Prev* 15: 2010–2012.



20. Morris JK, George LM, Wu T, Wald NJ (2006) Insulin-like growth factors and cancer: no role in screening. Evidence from the BUPA study and meta-analysis of prospective epidemiological studies. *Br J Cancer* 95: 112–117.
21. Bhatavdekar JM, Patel DD, Chikhlikar PR, Mehta RH, Vora HH, et al. (1994) Levels of circulating peptide and steroid hormones in men with lung cancer. *Neoplasma* 41: 101–103.
22. Lee DY, Kim SJ, Lee YC (1999) Serum insulin-like growth factor (IGF)-I and IGF-binding proteins in lung cancer patients. *Journal of Korean Medical Science* 14: 401–404.
23. Wu XF, Yu H, Amos CI, Hong WK, Spitz MR (2000) Joint effect of insulin-like growth factors and mutagen sensitivity in lung cancer risk. *Journal of the National Cancer Institute* 92: 737–743.
24. Wang H, Wan YX, Zhang QK (2004) [Significance and expression of insulin-like growth factor 1 and IGF binding protein 3 in serum of patients with lung cancer]. *Ai Zheng* 23: 710–714.
25. Unsal E, Koksak D, Yurdakul AS, Atikcan S, Cinaz P (2005) Analysis of insulin like growth factor 1 and insulin like growth factor binding protein 3 levels in bronchoalveolar lavage fluid and serum of patients with lung cancer. *Respiratory Medicine* 99: 559–565.
26. Izycki T, Chyczewska E, Naumnik W, Ossolinska M (2006) Serum levels of IGF-I and IGFBP-3 in patients with lung cancer during chemotherapy. *Oncol Res* 16: 49–54.
27. Langholz B (2005) Case–Control Study, Nested. *Encyclopedia of Biostatistics*.
28. Nahler G (2009) nested case-control studies. *Dictionary of Pharmaceutical Medicine*: 120–120.
29. Ernster VL (1994) Nested case-control studies. *Preventive Medicine* 23: 587–590.
30. Higgins JP, Thompson SG, Deeks JJ, Altman DG (2003) Measuring inconsistency in meta-analyses. *BMJ* 327: 557–560.
31. Mantel N, Haenszel W (1959) Statistical aspects of the analysis of data from retrospective studies of disease. *J Natl Cancer Inst* 22: 719–748.
32. DerSimonian R, Laird N (1986) Meta-analysis in clinical trials. *Control Clin Trials* 7: 177–188.
33. Patsopoulos NA, Evangelou E, Ioannidis JP (2008) Sensitivity of between-study heterogeneity in meta-analysis: proposed metrics and empirical evaluation. *Int J Epidemiol* 37: 1148–1157.
34. Egger M, Davey Smith G, Schneider M, Minder C (1997) Bias in meta-analysis detected by a simple, graphical test. *BMJ* 315: 629–634.
35. A T (1999) Assessing the influence of a single study in the meta-analysis estimate. *Stata Tech Bull* 47: 15–17.
36. Wu X, Yu H, Amos CI, Hong WK, Spitz MR (2000) Joint effect of insulin-like growth factors and mutagen sensitivity in lung cancer risk. *J Natl Cancer Inst* 92: 737–743.
37. Shi R, Berkel HJ, Yu H (2001) Insulin-like growth factor-I and prostate cancer: a meta-analysis. *Br J Cancer* 85: 991–996.
38. Rowlands MA, Gunnell D, Harris R, Vatten IJ, Holly JM, et al. (2009) Circulating insulin-like growth factor peptides and prostate cancer risk: a systematic review and meta-analysis. *Int J Cancer* 124: 2416–2429.
39. Sugumar A, Liu YC, Xia Q, Koh YS, Matsuo K (2004) Insulin-like growth factor (IGF)-I and IGF-binding protein 3 and the risk of premenopausal breast cancer: a meta-analysis of literature. *Int J Cancer* 111: 293–297.
40. Key TJ, Appleby PN, Reeves GK, Roddam AW (2010) Insulin-like growth factor 1 (IGF1), IGF binding protein 3 (IGFBP3), and breast cancer risk: pooled individual data analysis of 17 prospective studies. *Lancet Oncol* 11: 530–542.
41. Duan QH, Wang ZG, Zhu GB, Lu ZX, Shi LY, et al. (2005) [Study on the relations between serum insulin-like growth factor-1, insulin-like growth factor binding protein-3 and colorectal cancer: a meta-analysis]. *Zhonghua Liu Xing Bing Xue Za Zhi* 26: 132–134.
42. Rinaldi S, Cleveland R, Norat T, Biessy C, Rohrmann S, et al. (2010) Serum levels of IGF-I, IGFBP-3 and colorectal cancer risk: results from the EPIC cohort, plus a meta-analysis of prospective studies. *Int J Cancer* 126: 1702–1715.
43. Renehan AG, Zwahlen M, Minder C, O'Dwyer ST, Shalet SM, et al. (2004) Insulin-like growth factor (IGF)-I, IGF binding protein-3, and cancer risk: systematic review and meta-regression analysis. *Lancet* 363: 1346–1353.
44. Chen B, Liu S, Xu W, Wang X, Zhao W, et al. (2009) IGF-I and IGFBP-3 and the risk of lung cancer: a meta-analysis based on nested case-control studies. *J Exp Clin Cancer Res* 28: 89.
